# Supplementary material
Source: PubMed Central journal article supplement (PMC7053040)
Supplement: jcsm.16.2.243.SD1.pdf [file jcsm.16.2.243.SD1.pdf]

## SUPPLEMENTAL METHODOLOGY

### **Cognitive assessment:**

The cognitive assessment was performed in a two-step process according to our protocol<sup>24</sup>. At the first visit, participants were evaluated with a cognitive screening test, the Dementia Rating Scale version 2 (DRS-2). This test has 5 cognitive subscale scores (Attention, Memory, Initiation-Perseveration, Conceptualization and Construction) as well as a total score. The Attention subscale measures selective attention, verbal span and praxis; the Memory subscale measures verbal and visual memory and orientation; Initiation-Perseveration measures a component of executive function and semantic verbal fluency; Conceptualization measures verbal and nonverbal reasoning; and construction measures visual construction abilities. The Initiation-Perseveration and Conceptualization scores were averaged to obtain an executive function score.

Then, raw DRS-2 scores were adjusted for age and education following previously published normative data of our group in which we used common methodology to normalize cognitive scores<sup>25</sup>. Those participants who were suspected of having cognitive impairment (i.e., having a Total DRS-2 score below 8, adjusted for age and education<sup>25</sup>) were invited to undergo a second cognitive visit. Briefly, this second visit consisted of a complete cognitive, behavioral and functional evaluation, a physical examination and a complete neuropsychological battery, after which cognitive diagnosis was established<sup>24</sup>. Participants with depression or anxiety were also considered for the analysis if the mood disorder was treated and under control (two participants had depression, and one had anxiety).

The test conducted and functions evaluated during this second visit are summarized below:

| COGNITIVE TEST                        | FUNCTION EVALUATED                  |
|---------------------------------------|-------------------------------------|
| Rey Auditory Verbal Learning Test     | Immediate and delayed verbal memory |
| WMS-III: Visual Reproduction I and II | Immediate and delayed visual memory |

|                                                                     |                                                                 |
|---------------------------------------------------------------------|-----------------------------------------------------------------|
| TMT A and B                                                         | Visual attention and task switching                             |
| WAIS-III Block Design                                               | Spatial component of perception                                 |
| COWAT Fluency Tests                                                 | Language and executive function                                 |
| Stroop Test                                                         | Selective attention, cognitive flexibility and processing speed |
| Clock Drawing                                                       | Visuospatial and constructional abilities                       |
| Barcelona Test: symbolic gestures                                   | Gestural praxis                                                 |
| Barcelona Test: sequences and imitation of postures                 | Ideomotor praxis                                                |
| Interview for Deterioration in Daily Living Activities for Dementia | Basic and instrumental activities of daily living               |
| Zung Self-Rating Depression and Anxiety Scales                      | Anxiety and depression symptoms                                 |

COWAT: Controlled Oral Word Association Test.

Other participants who had a Total DRS-2 score > 8 adjusted for age and education were considered normal cognitive aging (NCA) participants.

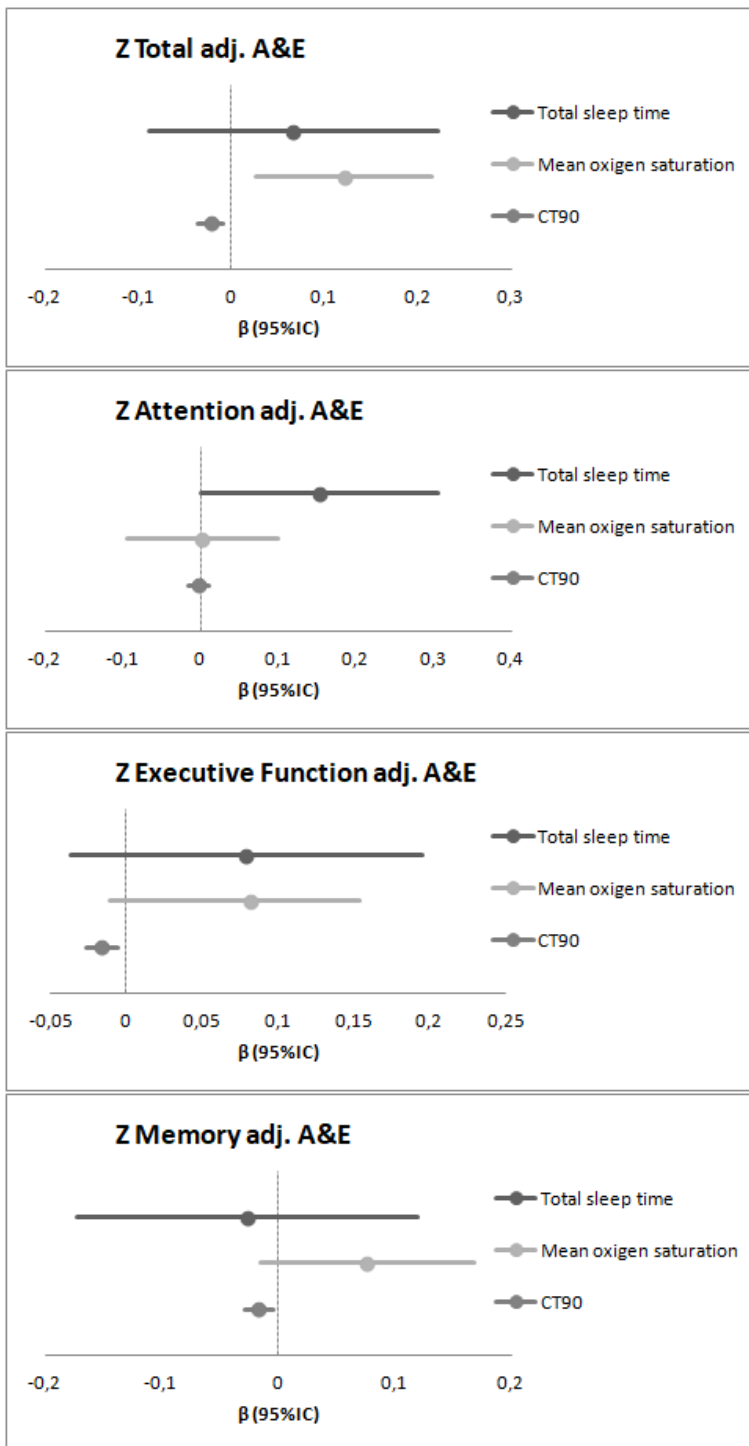

Supplemental Figure 1: Graphic description of the association between the cognitive scores and sleep parameters

Adj. A&E: adjusted for age and education; CT90: % of time with oxygen saturation < 90%

The analysis is adjusted for sex, systolic blood pressure, diabetes mellitus, body mass index, smoking, silent brain infarcts, and white matter hyperintensities  $\geq 2$  on the Fazekas scale

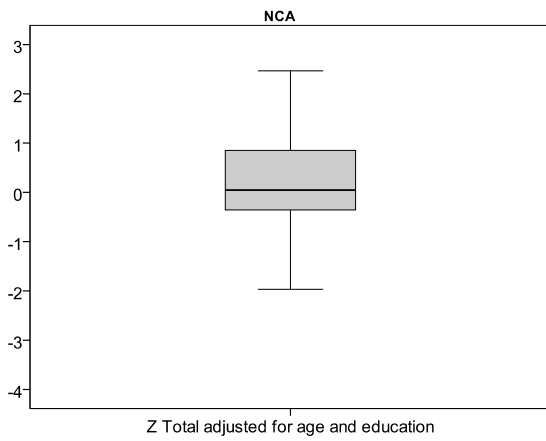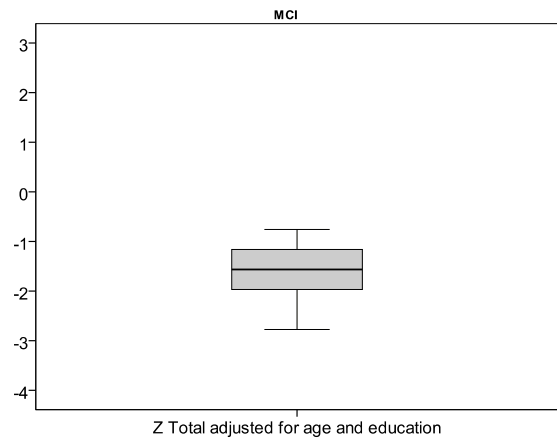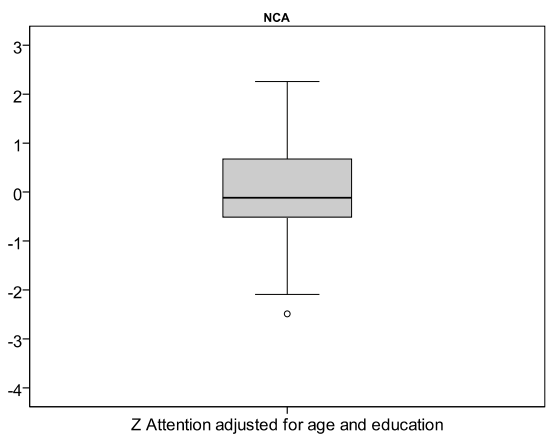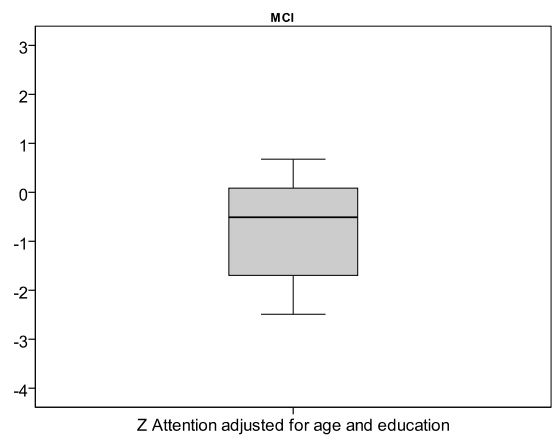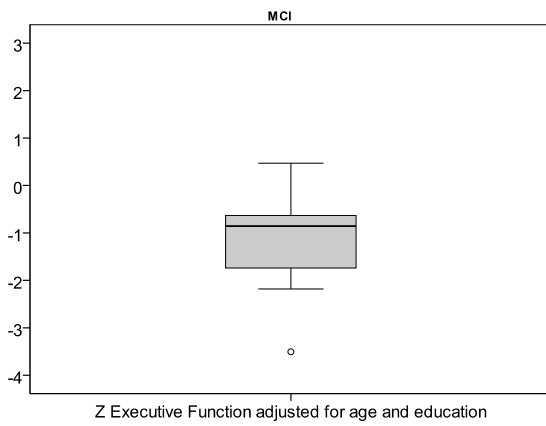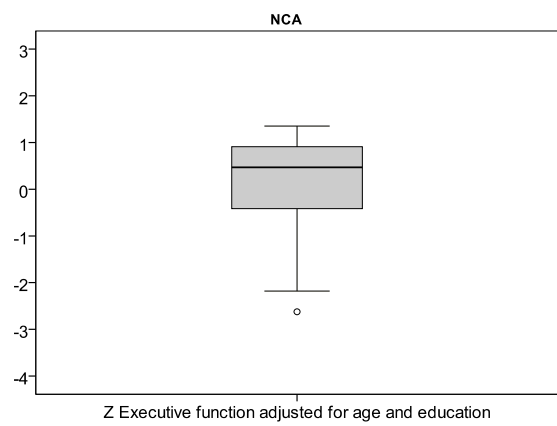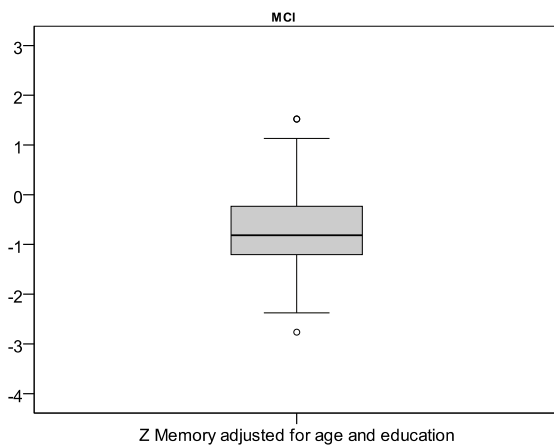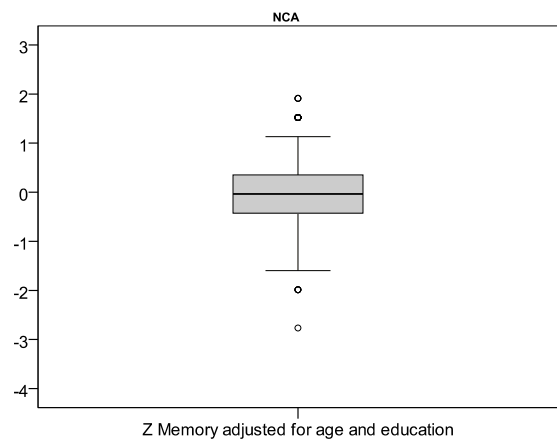

Supplemental Figure 2: Graphical description of the relation between cognitive status and cognitive Z scores on the Dementia Rating Scale version2 .

NCA: normal cognitive aging

MCI: mild cognitive impairment

Supplemental Table 1: Association between cognitive scores and sleep respiratory parameters

stratified by the presence or absence of extensive *periventricular* white matter

hyperintensities

|                                   | WMH | Z Total adj. A&E<br>β(95% CI) | Z Attention adj. A&E<br>β(95% CI) | Z Executive Function<br>adj. A&E<br>β(95% CI) | Z Memory adj. A&E<br>β(95% CI) |
|-----------------------------------|-----|-------------------------------|-----------------------------------|-----------------------------------------------|--------------------------------|
| Mean O <sub>2</sub><br>saturation | Yes | 0.066(-0.285,0.417)           | -0.046(-0.367,0.275)              | 0.029(-0.202,0.261)                           | 0.093(-0.209,0.395)            |
|                                   | No  | <b>0.125(0.025,0.225)</b>     | 0.015(-0.090,0.120)               | 0.089(0.015,0.163)                            | 0.074(-0.025,0.174)            |
| CT90                              | Yes | -0.007(-0.057,0.044)          | 0.009(-0.038,0.056)               | -0.007(-0.040,0.026)                          | 0.000(-0.046,0.045)            |
|                                   | No  | <b>-0.023(-0.037,-0.009)</b>  | -0.006(-0.021,0.009)              | <b>-0.015(-0.026,-0.005)</b>                  | <b>-0.021(-0.035,-0.007)</b>   |
| Total sleep<br>time               | Yes | 0.101(-0.587,0.789)           | 0.089(-0.540,0.718)               | -0.004(-0.458,0.451)                          | 0.175(-0.418,0.767)            |
|                                   | No  | 0.052(-0.108,0.213)           | <b>0.171(0.009,0.333)</b>         | 0.077(-0.042,0.195)                           | -0.013(-0.169,0.143)           |

CT90: % time <90% O<sub>2</sub> saturation

Association between cognitive scores and sleep respiratory parameters stratified by the

presence or absence of *deep* white matter hyperintensities

|                                   | WMH | Z Total adj. A&E<br>β(95% CI) | Z Attention adj. A&E<br>β(95% CI) | Z Executive Function<br>adj. A&E<br>β(95% CI) | Z Memory adj. A&E<br>β(95% CI) |
|-----------------------------------|-----|-------------------------------|-----------------------------------|-----------------------------------------------|--------------------------------|
| Mean O <sub>2</sub><br>saturation | Yes | 0.207(-1.13,1.55)             | 0.291(-0.908,1.490)               | 0.073(-0.941,1.088)                           | 0.186(-1.512,1.885)            |
|                                   | No  | <b>0.132(0.037,0.226)</b>     | -0.014(-1.112,0.084)              | <b>0.101(0.030,0.173)</b>                     | 0.066(-0.029,0.161)            |
| CT90                              | Yes | -0.192(-0.638,0.254)          | -0.120(-2.202,1.963)              | -0.125(-0.327,0.077)                          | -0.077(-2.443,2.289)           |
|                                   | No  | <b>-0.024(-0.037,-0.012)</b>  | -0.003(-0.017,0.011)              | <b>-0.018(-0.028,-0.008)</b>                  | <b>-0.017(-0.030,-0.005)</b>   |
| Total sleep<br>time               | Yes | -0.149(-2.340,2.042)          | -0.100(-2.331,2.132)              | -2.05(-1.645,1.234)                           | 0.625(-1.301,2.550)            |
|                                   | No  | 0.054(-0.103,0.210)           | <b>0.176(0.022,0.330)</b>         | 0.067(-0.051,0.186)                           | -0.028(-0.179,0.124)           |

CT90: % time <90% O<sub>2</sub> saturation
